# Supplementary material for: Genetic Diversity and Reproduction Trends of Phytophthora infestans in Estonia: EU_41_A2 Detected without an Indication of Clonal Reproduction
Source: MDPI journal article supplement (doi:10.3390/jof10030233), 2024-03-21
Supplement: s1 [file s1]

**Table S1.** Gene diversity ( $H_e$ ) in 11 SSR loci and allele frequencies for all the sampled 153 isolates by sampling years (2005 (n = 16), 2006 (n = 15), 2007 (n = 14), 2010 (n = 10), 2011 (n = 10), 2012 (n = 10), 2016 (n = 25), 2017 (n = 23), 2021 (n = 19) and 2022 (n = 11)) in Estonia.

| SSR locus         | Allele | Frequency in a year |       |       |       |       |       |       |       |       |       | Gene diversity ( $H_e$ ) |
|-------------------|--------|---------------------|-------|-------|-------|-------|-------|-------|-------|-------|-------|--------------------------|
|                   |        | 2005                | 2006  | 2007  | 2010  | 2011  | 2012  | 2016  | 2017  | 2021  | 2022  |                          |
| Pi02<br>(n = 153) | 258    | 0.000               | 0.000 | 0.143 | 0.050 | 0.000 | 0.000 | 0.020 | 0.043 | 0.026 | 0.000 | 0.295                    |
|                   | 266    | 0.188               | 0.133 | 0.143 | 0.000 | 0.100 | 0.200 | 0.200 | 0.130 | 0.132 | 0.136 |                          |
|                   | 268    | 0.813               | 0.867 | 0.714 | 0.950 | 0.900 | 0.800 | 0.780 | 0.826 | 0.842 | 0.864 |                          |
| Pi4B<br>(n = 153) | 205    | 0.438               | 0.500 | 0.321 | 0.300 | 0.300 | 0.150 | 0.540 | 0.413 | 0.289 | 0.409 | 0.662                    |
|                   | 213    | 0.125               | 0.300 | 0.357 | 0.350 | 0.300 | 0.400 | 0.200 | 0.370 | 0.395 | 0.136 |                          |
|                   | 217    | 0.438               | 0.200 | 0.321 | 0.350 | 0.400 | 0.450 | 0.260 | 0.217 | 0.316 | 0.455 |                          |
| G11<br>(n = 147)  | 134    | 0.000               | 0.000 | 0.000 | 0.000 | 0.000 | 0.000 | 0.020 | 0.000 | 0.000 | 0.000 | 0.786                    |
|                   | 142    | 0.000               | 0.100 | 0.036 | 0.000 | 0.000 | 0.050 | 0.000 | 0.000 | 0.000 | 0.045 |                          |
|                   | 146    | 0.000               | 0.000 | 0.071 | 0.000 | 0.000 | 0.000 | 0.000 | 0.000 | 0.000 | 0.000 |                          |
|                   | 150    | 0.000               | 0.000 | 0.000 | 0.000 | 0.000 | 0.000 | 0.000 | 0.025 | 0.000 | 0.000 |                          |
|                   | 152    | 0.100               | 0.000 | 0.000 | 0.000 | 0.000 | 0.000 | 0.020 | 0.000 | 0.000 | 0.000 |                          |
|                   | 154    | 0.333               | 0.267 | 0.143 | 0.200 | 0.250 | 0.150 | 0.340 | 0.400 | 0.029 | 0.136 |                          |
|                   | 156    | 0.233               | 0.000 | 0.000 | 0.050 | 0.150 | 0.350 | 0.180 | 0.200 | 0.147 | 0.045 |                          |
|                   | 158    | 0.000               | 0.067 | 0.000 | 0.000 | 0.000 | 0.000 | 0.000 | 0.000 | 0.000 | 0.045 |                          |
|                   | 160    | 0.100               | 0.000 | 0.179 | 0.200 | 0.100 | 0.100 | 0.080 | 0.175 | 0.235 | 0.318 |                          |
|                   | 162    | 0.167               | 0.500 | 0.393 | 0.450 | 0.500 | 0.150 | 0.260 | 0.200 | 0.471 | 0.364 |                          |
|                   | 164    | 0.000               | 0.000 | 0.000 | 0.000 | 0.000 | 0.000 | 0.020 | 0.000 | 0.000 | 0.000 |                          |
|                   | 166    | 0.033               | 0.000 | 0.000 | 0.000 | 0.000 | 0.000 | 0.000 | 0.000 | 0.000 | 0.000 |                          |
|                   | 206    | 0.033               | 0.067 | 0.179 | 0.100 | 0.000 | 0.200 | 0.040 | 0.000 | 0.059 | 0.045 |                          |
|                   | 208    | 0.000               | 0.000 | 0.000 | 0.000 | 0.000 | 0.000 | 0.020 | 0.000 | 0.000 | 0.000 |                          |
|                   | 210    | 0.000               | 0.000 | 0.000 | 0.000 | 0.000 | 0.000 | 0.020 | 0.000 | 0.059 | 0.000 |                          |

| SSR locus          | Allele | Frequency in a year |       |       |       |       |       |       |       |       |       | Gene diversity<br>( $H_e$ ) |
|--------------------|--------|---------------------|-------|-------|-------|-------|-------|-------|-------|-------|-------|-----------------------------|
|                    |        | 2005                | 2006  | 2007  | 2010  | 2011  | 2012  | 2016  | 2017  | 2021  | 2022  |                             |
| Pi04<br>(n = 153)  | 160    | 0.000               | 0.000 | 0.000 | 0.000 | 0.000 | 0.000 | 0.020 | 0.000 | 0.000 | 0.000 | 0.613                       |
|                    | 166    | 0.344               | 0.467 | 0.464 | 0.400 | 0.400 | 0.300 | 0.440 | 0.391 | 0.421 | 0.182 |                             |
|                    | 168    | 0.125               | 0.000 | 0.107 | 0.100 | 0.200 | 0.200 | 0.080 | 0.152 | 0.211 | 0.364 |                             |
|                    | 170    | 0.531               | 0.533 | 0.429 | 0.500 | 0.400 | 0.500 | 0.460 | 0.457 | 0.368 | 0.455 |                             |
| Pi63<br>(n = 151)  | 270    | 0.438               | 0.133 | 0.125 | 0.100 | 0.200 | 0.250 | 0.240 | 0.239 | 0.263 | 0.227 | 0.596                       |
|                    | 273    | 0.125               | 0.333 | 0.333 | 0.250 | 0.150 | 0.150 | 0.160 | 0.130 | 0.263 | 0.318 |                             |
|                    | 276    | 0.000               | 0.033 | 0.000 | 0.000 | 0.000 | 0.000 | 0.000 | 0.000 | 0.000 | 0.000 |                             |
|                    | 279    | 0.438               | 0.500 | 0.542 | 0.650 | 0.650 | 0.600 | 0.600 | 0.630 | 0.474 | 0.455 |                             |
| Pi70<br>(n = 151)  | 189    | 0.063               | 0.000 | 0.000 | 0.000 | 0.000 | 0.000 | 0.000 | 0.000 | 0.000 | 0.000 | 0.142                       |
|                    | 192    | 0.781               | 0.967 | 0.929 | 1.000 | 0.850 | 1.000 | 0.958 | 0.978 | 0.842 | 0.950 |                             |
|                    | 195    | 0.156               | 0.033 | 0.071 | 0.000 | 0.150 | 0.000 | 0.042 | 0.022 | 0.158 | 0.050 |                             |
| SSR11<br>(n = 150) | 331    | 0.063               | 0.133 | 0.077 | 0.000 | 0.150 | 0.300 | 0.180 | 0.119 | 0.079 | 0.045 | 0.584                       |
|                    | 341    | 0.594               | 0.367 | 0.346 | 0.800 | 0.650 | 0.450 | 0.400 | 0.548 | 0.658 | 0.500 |                             |
|                    | 355    | 0.344               | 0.500 | 0.577 | 0.200 | 0.200 | 0.250 | 0.420 | 0.333 | 0.263 | 0.455 |                             |
| SSR2<br>(n = 153)  | 173    | 0.688               | 0.900 | 0.679 | 0.750 | 0.700 | 0.700 | 0.660 | 0.696 | 0.684 | 0.818 | 0.404                       |
|                    | 175    | 0.313               | 0.100 | 0.321 | 0.250 | 0.300 | 0.300 | 0.340 | 0.304 | 0.316 | 0.182 |                             |
| SSR4<br>(n = 151)  | 284    | 0.250               | 0.400 | 0.393 | 0.100 | 0.350 | 0.350 | 0.220 | 0.227 | 0.389 | 0.500 | 0.782                       |
|                    | 286    | 0.000               | 0.000 | 0.036 | 0.000 | 0.000 | 0.000 | 0.000 | 0.023 | 0.000 | 0.000 |                             |
|                    | 288    | 0.156               | 0.100 | 0.250 | 0.100 | 0.100 | 0.100 | 0.200 | 0.250 | 0.111 | 0.045 |                             |
|                    | 290    | 0.000               | 0.000 | 0.000 | 0.000 | 0.000 | 0.000 | 0.040 | 0.023 | 0.139 | 0.000 |                             |
|                    | 292    | 0.250               | 0.200 | 0.071 | 0.300 | 0.050 | 0.100 | 0.260 | 0.250 | 0.222 | 0.091 |                             |
|                    | 294    | 0.313               | 0.267 | 0.179 | 0.400 | 0.400 | 0.400 | 0.240 | 0.136 | 0.028 | 0.273 |                             |
|                    | 296    | 0.031               | 0.033 | 0.036 | 0.100 | 0.100 | 0.050 | 0.040 | 0.091 | 0.083 | 0.000 |                             |
|                    | 298    | 0.000               | 0.000 | 0.036 | 0.000 | 0.000 | 0.000 | 0.000 | 0.000 | 0.028 | 0.000 |                             |

| SSR locus         | Allele | Frequency in a year |       |       |       |       |       |       |       |       |       | Gene diversity<br>( $H_e$ ) |
|-------------------|--------|---------------------|-------|-------|-------|-------|-------|-------|-------|-------|-------|-----------------------------|
|                   |        | 2005                | 2006  | 2007  | 2010  | 2011  | 2012  | 2016  | 2017  | 2021  | 2022  |                             |
| SSR6<br>(n = 153) | 238    | 0.000               | 0.000 | 0.000 | 0.000 | 0.000 | 0.000 | 0.000 | 0.000 | 0.026 | 0.000 | 0.498                       |
|                   | 240    | 0.000               | 0.000 | 0.036 | 0.000 | 0.000 | 0.100 | 0.000 | 0.000 | 0.026 | 0.045 |                             |
|                   | 242    | 0.375               | 0.400 | 0.214 | 0.500 | 0.400 | 0.250 | 0.400 | 0.283 | 0.447 | 0.455 |                             |
|                   | 244    | 0.625               | 0.600 | 0.679 | 0.500 | 0.600 | 0.650 | 0.600 | 0.717 | 0.500 | 0.500 |                             |
|                   | 246    | 0.000               | 0.000 | 0.071 | 0.000 | 0.000 | 0.000 | 0.000 | 0.000 | 0.000 | 0.000 |                             |
| SSR8<br>(n = 147) | 260    | 0.667               | 0.433 | 0.542 | 0.700 | 0.550 | 0.600 | 0.480 | 0.614 | 0.529 | 0.500 | 0.517                       |
|                   | 264    | 0.033               | 0.100 | 0.000 | 0.000 | 0.000 | 0.000 | 0.020 | 0.023 | 0.059 | 0.000 |                             |
|                   | 266    | 0.300               | 0.467 | 0.458 | 0.300 | 0.450 | 0.400 | 0.500 | 0.364 | 0.412 | 0.500 |                             |

**Table S2.** The number of allele pairs found in the isolates of the Estonian *P. infestans* population in different sampling years (2005 (n = 16), 2006 (n = 15), 2007 (n = 14), 2010 (n = 10), 2011 (n = 10), 2012 (n = 10), 2016 (n = 25), 2017 (n = 23), 2021 (n = 19) and 2022 (n = 11)).

| SSR locus         | Allele pair | Number of isolates | Number of isolates in a year |      |      |      |      |      |      |      |      |      | Overall frequency |
|-------------------|-------------|--------------------|------------------------------|------|------|------|------|------|------|------|------|------|-------------------|
|                   |             |                    | 2005                         | 2006 | 2007 | 2010 | 2011 | 2012 | 2016 | 2017 | 2021 | 2022 |                   |
| Pi02<br>(n = 153) | 258/258     | 1                  |                              |      | 1    |      |      |      |      |      |      |      | 0.007             |
|                   | 258/266     | 3                  |                              |      |      |      |      |      | 1    | 1    | 1    |      | 0.020             |
|                   | 258/268     | 4                  |                              |      | 2    | 1    |      |      |      | 1    |      |      | 0.026             |
|                   | 266/266     | 4                  | 1                            |      |      |      |      |      | 2    |      |      | 1    | 0.026             |
|                   | 266/268     | 33                 | 4                            | 4    | 4    |      | 2    | 4    | 5    | 5    | 4    | 1    | 0.216             |
|                   | 268/268     | 108                | 11                           | 11   | 7    | 9    | 8    | 6    | 17   | 16   | 14   | 9    | 0.706             |
| Pi4B<br>(n = 153) | 205/205     | 20                 | 1                            | 3    | 1    | 2    | 1    |      | 6    | 2    | 2    | 2    | 0.131             |
|                   | 205/213     | 38                 | 4                            | 6    | 5    |      | 1    | 3    | 6    | 10   | 2    | 1    | 0.248             |
|                   | 205/217     | 41                 | 8                            | 3    | 2    | 2    | 3    |      | 9    | 5    | 5    | 4    | 0.268             |
|                   | 213/213     | 11                 |                              | 1    | 1    | 1    | 2    |      |      | 2    | 3    | 1    | 0.072             |
|                   | 213/217     | 29                 |                              | 1    | 3    | 5    | 1    | 5    | 4    | 3    | 7    |      | 0.190             |
|                   | 217/217     | 14                 | 3                            | 1    | 2    |      | 2    | 2    |      | 1    |      | 3    | 0.092             |

| SSR locus        | Allele pair | Number of isolates | Number of isolates in a year |      |      |      |      |      |      |      |      |      | Overall frequency |
|------------------|-------------|--------------------|------------------------------|------|------|------|------|------|------|------|------|------|-------------------|
|                  |             |                    | 2005                         | 2006 | 2007 | 2010 | 2011 | 2012 | 2016 | 2017 | 2021 | 2022 |                   |
| G11<br>(n = 147) | 134/160     | 1                  |                              |      |      |      |      |      | 1    |      |      |      | 0.007             |
|                  | 142/142     | 1                  |                              | 1    |      |      |      |      |      |      |      |      | 0.007             |
|                  | 142/156     | 1                  |                              |      |      |      |      | 1    |      |      |      |      | 0.007             |
|                  | 142/160     | 1                  |                              |      | 1    |      |      |      |      |      |      |      | 0.007             |
|                  | 142/162     | 1                  |                              |      |      |      |      |      |      |      |      | 1    | 0.007             |
|                  | 142/206     | 1                  |                              | 1    |      |      |      |      |      |      |      |      | 0.007             |
|                  | 146/146     | 1                  |                              |      | 1    |      |      |      |      |      |      |      | 0.007             |
|                  | 150/154     | 1                  |                              |      |      |      |      |      |      | 1    |      |      | 0.007             |
|                  | 152/152     | 1                  | 1                            |      |      |      |      |      |      |      |      |      | 0.007             |
|                  | 152/156     | 1                  | 1                            |      |      |      |      |      |      |      |      |      | 0.007             |
|                  | 152/162     | 1                  |                              |      |      |      |      |      | 1    |      |      |      | 0.007             |
|                  | 154/154     | 21                 | 4                            | 2    | 1    | 2    | 2    |      | 5    | 5    |      |      | 0.143             |
|                  | 154/156     | 7                  | 1                            |      |      |      | 1    |      | 2    | 3    |      |      | 0.048             |
|                  | 154/158     | 3                  |                              | 2    |      |      |      |      |      |      |      | 1    | 0.020             |
|                  | 154/160     | 5                  |                              |      |      |      |      |      | 2    | 1    | 1    | 1    | 0.034             |
|                  | 154/162     | 9                  | 1                            | 2    | 2    |      |      | 1    | 1    | 1    |      | 1    | 0.061             |
|                  | 154/164     | 1                  |                              |      |      |      |      |      | 1    |      |      |      | 0.007             |
|                  | 154/206     | 3                  |                              |      |      |      |      | 2    | 1    |      |      |      | 0.020             |
|                  | 156/156     | 10                 | 2                            |      |      |      | 1    | 3    | 2    | 2    |      |      | 0.068             |
|                  | 156/162     | 5                  |                              |      |      | 1    |      |      | 1    | 1    | 1    | 1    | 0.034             |
|                  | 156/206     | 4                  | 1                            |      |      |      |      |      | 1    |      | 2    |      | 0.027             |
|                  | 156/208     | 1                  |                              |      |      |      |      |      | 1    |      |      |      | 0.007             |
|                  | 156/210     | 2                  |                              |      |      |      |      |      |      |      | 2    |      | 0.014             |
|                  | 160/160     | 8                  | 1                            |      |      |      |      | 1    |      | 3    | 3    |      | 0.054             |
|                  | 160/162     | 15                 | 1                            |      | 3    | 2    | 2    |      | 1    |      | 1    | 5    | 0.102             |
|                  | 160/206     | 4                  |                              |      | 1    | 2    |      |      |      |      |      | 1    | 0.027             |
|                  | 162/162     | 31                 | 1                            | 6    | 2    | 3    | 4    | 1    | 4    | 3    | 7    |      | 0.211             |
|                  | 162/166     | 1                  | 1                            |      |      |      |      |      |      |      |      |      | 0.007             |
|                  | 162/206     | 3                  |                              | 1    | 2    |      |      |      |      |      |      |      | 0.020             |
|                  | 162/210     | 1                  |                              |      |      |      |      |      | 1    |      |      |      | 0.007             |
|                  | 206/206     | 2                  |                              |      | 1    |      |      | 1    |      |      |      |      | 0.014             |

| SSR locus          | Allele pair | Number of isolates | Number of isolates in a year |      |      |      |      |      |      |      |      |      | Overall frequency |
|--------------------|-------------|--------------------|------------------------------|------|------|------|------|------|------|------|------|------|-------------------|
|                    |             |                    | 2005                         | 2006 | 2007 | 2010 | 2011 | 2012 | 2016 | 2017 | 2021 | 2022 |                   |
| Pi04<br>(n = 153)  | 160/166     | 1                  |                              |      |      |      |      |      | 1    |      |      |      | 0.007             |
|                    | 166/166     | 1                  |                              |      |      |      |      |      |      |      | 1    |      | 0.007             |
|                    | 166/168     | 1                  |                              |      | 1    |      |      |      |      |      |      |      | 0.007             |
|                    | 166/170     | 116                | 11                           | 14   | 12   | 8    | 8    | 6    | 21   | 18   | 14   | 4    | 0.758             |
|                    | 168/168     | 21                 | 2                            |      | 1    | 1    | 2    | 2    | 2    | 3    | 4    | 4    | 0.137             |
|                    | 168/170     | 1                  |                              |      |      |      |      |      |      | 1    |      |      | 0.007             |
|                    | 170/170     | 12                 | 3                            | 1    |      | 1    |      | 2    | 1    | 1    |      | 3    | 0.078             |
| Pi63<br>(n = 151)  | 270/270     | 7                  | 4                            |      |      |      |      |      | 1    |      | 1    | 1    | 0.046             |
|                    | 270/273     | 16                 |                              | 3    | 2    |      | 2    | 1    | 2    | 1    | 2    | 3    | 0.106             |
|                    | 270/279     | 40                 | 6                            | 1    | 1    | 2    | 2    | 4    | 8    | 10   | 6    |      | 0.265             |
|                    | 273/273     | 6                  | 1                            | 3    |      |      |      |      |      |      | 2    |      | 0.040             |
|                    | 273/279     | 36                 | 2                            | 1    | 6    | 5    | 1    | 2    | 6    | 5    | 4    | 4    | 0.238             |
|                    | 276/279     | 1                  |                              | 1    |      |      |      |      |      |      |      |      | 0.007             |
|                    | 279/279     | 45                 | 3                            | 6    | 3    | 3    | 5    | 3    | 8    | 7    | 4    | 3    | 0.298             |
| Pi70<br>(n = 151)  | 189/189     | 1                  | 1                            |      |      |      |      |      |      |      |      |      | 0.007             |
|                    | 192/192     | 131                | 12                           | 14   | 12   | 10   | 7    | 10   | 22   | 22   | 13   | 9    | 0.868             |
|                    | 192/195     | 17                 | 1                            | 1    | 2    |      | 3    |      | 2    | 1    | 6    | 1    | 0.113             |
|                    | 195/195     | 2                  | 2                            |      |      |      |      |      |      |      |      |      | 0.013             |
| SSR11<br>(n = 150) | 331/331     | 2                  |                              |      |      |      |      |      | 2    |      |      |      | 0.013             |
|                    | 331/341     | 22                 | 2                            | 4    |      |      | 1    | 5    | 1    | 5    | 3    | 1    | 0.147             |
|                    | 331/355     | 9                  |                              |      | 2    |      | 2    | 1    | 4    |      |      |      | 0.060             |
|                    | 341/341     | 43                 | 4                            | 3    | 3    | 7    | 5    | 1    | 7    | 4    | 8    | 1    | 0.287             |
|                    | 341/355     | 48                 | 9                            | 1    | 3    | 2    | 2    | 2    | 5    | 10   | 6    | 8    | 0.320             |
|                    | 355/355     | 26                 | 1                            | 7    | 5    | 1    |      | 1    | 6    | 2    | 2    | 1    | 0.173             |
| SSR2<br>(n = 153)  | 173/173     | 79                 | 8                            | 12   | 8    | 5    | 6    | 4    | 10   | 10   | 9    | 7    | 0.516             |
|                    | 173/175     | 62                 | 6                            | 3    | 3    | 5    | 2    | 6    | 13   | 12   | 8    | 4    | 0.405             |
|                    | 175/175     | 12                 | 2                            |      | 3    |      | 2    |      | 2    | 1    | 2    |      | 0.078             |

| SSR locus         | Allele pair | Number of isolates | Number of isolates in a year |      |      |      |      |      |      |      |      |      | Overall frequency |
|-------------------|-------------|--------------------|------------------------------|------|------|------|------|------|------|------|------|------|-------------------|
|                   |             |                    | 2005                         | 2006 | 2007 | 2010 | 2011 | 2012 | 2016 | 2017 | 2021 | 2022 |                   |
| SSR4<br>(n = 151) | 284/284     | 13                 | 2                            |      | 3    |      | 1    | 2    | 2    |      | 1    | 2    | 0.086             |
|                   | 284/288     | 15                 | 1                            | 3    | 3    |      | 2    |      |      | 2    | 4    |      | 0.099             |
|                   | 284/290     | 4                  |                              |      |      |      |      |      |      |      | 4    |      | 0.026             |
|                   | 284/292     | 21                 | 1                            | 3    |      |      | 1    | 1    | 4    | 5    | 4    | 2    | 0.139             |
|                   | 284/294     | 20                 | 2                            | 5    | 2    | 1    | 2    | 2    | 2    | 1    |      | 3    | 0.132             |
|                   | 284/296     | 5                  |                              | 1    |      | 1    |      |      | 1    | 2    |      |      | 0.033             |
|                   | 284/302     | 2                  |                              |      |      |      |      |      |      |      |      | 2    | 0.013             |
|                   | 286/292     | 1                  |                              |      |      |      |      |      |      | 1    |      |      | 0.007             |
|                   | 286/298     | 1                  |                              |      | 1    |      |      |      |      |      |      |      | 0.007             |
|                   | 288/288     | 2                  |                              |      |      |      |      |      | 2    |      |      |      | 0.013             |
|                   | 288/290     | 3                  |                              |      |      |      |      |      | 2    | 1    |      |      | 0.020             |
|                   | 288/292     | 4                  |                              |      | 1    |      |      |      |      | 3    |      |      | 0.026             |
|                   | 288/294     | 19                 | 4                            |      | 2    | 2    |      | 1    | 4    | 5    |      | 1    | 0.126             |
|                   | 288/296     | 2                  |                              |      | 1    |      |      | 1    |      |      |      |      | 0.013             |
|                   | 290/292     | 1                  |                              |      |      |      |      |      |      |      | 1    |      | 0.007             |
|                   | 292/292     | 6                  | 2                            |      |      | 2    |      |      | 2    |      |      |      | 0.040             |
|                   | 292/294     | 15                 | 3                            | 3    | 1    | 1    |      | 1    | 5    |      | 1    |      | 0.099             |
|                   | 292/296     | 4                  |                              |      |      | 1    |      |      |      | 2    | 1    |      | 0.026             |
|                   | 292/298     | 1                  |                              |      |      |      |      |      |      |      | 1    |      | 0.007             |
|                   | 294/294     | 7                  |                              |      |      | 2    | 2    | 2    |      |      |      | 1    | 0.046             |
|                   | 294/296     | 4                  | 1                            |      |      |      | 2    |      | 1    |      |      |      | 0.026             |
|                   | 296/296     | 1                  |                              |      |      |      |      |      |      |      | 1    |      | 0.007             |
| SSR6<br>(n = 153) | 238/242     | 1                  |                              |      |      |      |      |      |      |      | 1    |      | 0.007             |
|                   | 240/242     | 3                  |                              |      | 1    |      |      | 1    |      |      |      | 1    | 0.020             |
|                   | 240/244     | 2                  |                              |      |      |      |      | 1    |      |      | 1    |      | 0.013             |
|                   | 242/242     | 21                 | 4                            | 4    | 1    | 1    |      |      | 6    | 1    | 3    | 1    | 0.137             |
|                   | 242/244     | 67                 | 4                            | 4    | 3    | 8    | 8    | 4    | 8    | 11   | 10   | 7    | 0.438             |
|                   | 244/244     | 58                 | 8                            | 7    | 8    | 1    | 2    | 4    | 11   | 11   | 4    | 2    | 0.379             |
|                   | 246/246     | 1                  |                              |      | 1    |      |      |      |      |      |      |      | 0.007             |

| SSR locus         | Allele pair | Number of isolates | Number of isolates in a year |      |      |      |      |      |      |      |      |      | Overall frequency |
|-------------------|-------------|--------------------|------------------------------|------|------|------|------|------|------|------|------|------|-------------------|
|                   |             |                    | 2005                         | 2006 | 2007 | 2010 | 2011 | 2012 | 2016 | 2017 | 2021 | 2022 |                   |
| SSR8<br>(n = 147) | 260/260     | 43                 | 7                            | 3    | 2    | 4    | 4    | 3    | 4    | 9    | 4    | 3    | 0.293             |
|                   | 260/264     | 4                  | 1                            |      |      |      |      |      | 1    |      | 2    |      | 0.027             |
|                   | 260/266     | 73                 | 5                            | 7    | 9    | 6    | 3    | 6    | 15   | 9    | 8    | 5    | 0.497             |
|                   | 264/266     | 4                  |                              | 3    |      |      |      |      |      | 1    |      |      | 0.027             |
|                   | 266/266     | 23                 | 2                            | 2    | 1    |      | 3    | 1    | 5    | 3    | 3    | 3    | 0.156             |
